# Supplementary material for: Dihydrooxazine Byproduct of a McMurry–Melton Reaction en Route to a Synthetic Bacteriochlorin
Source: MDPI journal article supplement (doi:10.3390/org3030019), 2022-08-08

Supplementary Materials for:  
**Dihydrooxazine Byproduct of a McMurry-Melton Reaction**  
**En Route to a Synthetic Bacteriochlorin**

Vy-Phuong Tran,<sup>a</sup> Nobuyuki Matsumoto,<sup>a</sup> Phattananawee Nalaoh,<sup>b</sup> Haoyu Jing,<sup>a</sup>  
Chih-Yuan Chen,<sup>a</sup> and Jonathan S. Lindsey<sup>a,\*</sup>

<sup>a</sup>Department of Chemistry  
North Carolina State University  
Raleigh, North Carolina 27695-8204

<sup>b</sup>Department of Materials Science and Engineering  
School of Molecular Science and Engineering  
Vidyasirimedhi Institute of Science and Technology  
Wangchan, Rayong, 21210, Thailand

**Table of Contents**

| <b>Topic</b>           | <b>Pages</b> |
|------------------------|--------------|
| (1) X-ray crystal data | S2           |
| (2) pH simulation      | S3           |
| (3) NMR spectra data   | S3–S19       |

**(1) X-ray crystal data****Table S1.** Crystallographic data of **5b** and **5a**

| Identification code                            | <b>5a</b>                                                              | <b>5b</b>                                                                |
|------------------------------------------------|------------------------------------------------------------------------|--------------------------------------------------------------------------|
| CCDC number                                    | 2176728                                                                | 2176729                                                                  |
| Empirical formula                              | C <sub>22</sub> H <sub>26</sub> N <sub>2</sub> O <sub>4</sub>          | C <sub>22</sub> H <sub>28</sub> N <sub>2</sub> O <sub>6</sub>            |
| Formula weight                                 | 382.45                                                                 | 416.46                                                                   |
| Temperature/K                                  | 100.0                                                                  | 100.00                                                                   |
| Crystal system                                 | monoclinic                                                             | monoclinic                                                               |
| Space group                                    | P2 <sub>1</sub>                                                        | P2 <sub>1</sub> /c                                                       |
| a/Å                                            | 6.1873(4)                                                              | 11.9124(9)                                                               |
| b/Å                                            | 26.3380(17)                                                            | 12.6552(9)                                                               |
| c/Å                                            | 12.1924(8)                                                             | 13.9689(10)                                                              |
| $\alpha/^\circ$                                | 90                                                                     | 90                                                                       |
| $\beta/^\circ$                                 | 102.960(3)                                                             | 91.409(3)                                                                |
| $\gamma/^\circ$                                | 90                                                                     | 90                                                                       |
| Volume/Å <sup>3</sup>                          | 1936.3(2)                                                              | 2105.2(3)                                                                |
| Z                                              | 4                                                                      | 4                                                                        |
| $\rho_{\text{calc}}$ g/cm <sup>3</sup>         | 1.312                                                                  | 1.314                                                                    |
| $\mu/\text{mm}^{-1}$                           | 0.091                                                                  | 0.096                                                                    |
| F(000)                                         | 816.0                                                                  | 888.0                                                                    |
| Crystal size/mm <sup>3</sup>                   | 0.48 × 0.24 × 0.12                                                     | 0.22 × 0.16 × 0.12                                                       |
| Radiation                                      | MoK $\alpha$ ( $\lambda$ = 0.71073)                                    | MoK $\alpha$ ( $\lambda$ = 0.71073)                                      |
| 2 $\theta$ range for data collection/ $^\circ$ | 4.618 to 54.204                                                        | 4.344 to 54.968                                                          |
| Index ranges                                   | $-7 \leq h \leq 7$ ,<br>$-33 \leq k \leq 33$ ,<br>$-15 \leq l \leq 15$ | $-15 \leq h \leq 15$ ,<br>$-16 \leq k \leq 16$ ,<br>$-18 \leq l \leq 18$ |
| Reflections collected                          | 26402                                                                  | 62423                                                                    |
| Independent reflections                        | 8506 [ $R_{\text{int}}$ = 0.0423,<br>$R_{\text{sigma}}$ = 0.0483]      | 4831 [ $R_{\text{int}}$ = 0.0659,<br>$R_{\text{sigma}}$ = 0.0261]        |
| Data/restraints/parameters                     | 8506/1/521                                                             | 4831/0/313                                                               |
| Goodness-of-fit on F <sup>2</sup>              | 1.009                                                                  | 1.042                                                                    |
| Final R indexes [ $I \geq 2\sigma(I)$ ]        | $R_1$ = 0.0396, $wR_2$ = 0.0901                                        | $R_1$ = 0.0439, $wR_2$ = 0.1112                                          |
| Final R indexes [all data]                     | $R_1$ = 0.0515, $wR_2$ = 0.0950                                        | $R_1$ = 0.0569, $wR_2$ = 0.1188                                          |
| Largest diff. peak/hole / e Å <sup>-3</sup>    | 0.19/−0.26                                                             | 0.65/−0.33                                                               |
| Flack parameter                                | 0.1(4)                                                                 | —                                                                        |

## (2) pH Simulation

The pH simulations were computed using the following Python script:

```
import math
from scipy.optimize import fsolve
import matplotlib.pyplot as plt

pka = 9.25 # pKa of NH4
pkb = 9.25 # pKb of OAc-
kw = 1e-14 # constant
ka = 10 ** (-1 * pka) # Ka
kb = 10 ** (-1 * pkb) # Kb
equiv = 0.01 # [R-NO2] = 1 equiv = 0.01 M = 10 mM
# Assuming initial [HCl] = a M in [NH4OAc] = s M solution
# [H+] = x, [OH-] = y

def equations(p):
    x, y = p
    return (x*s/(ka + x) + x - y*s/(kb + y) - y - a, kw - x*y)

s_set = [1000, 400, 160, 64, 25.6]# [NH4OAc] (equiv)

# calculation and plot
fig, ax = plt.subplots(figsize=(6, 4))
for se in s_set:
    s = se * equiv
    pHs = []
    x, y = 1e-7, 1e-7 # initial guessing solutions
    for ae in range(120): # [HCl] (equiv)
        a = ae * equiv
        x, y = fsolve(equations, (x, y), factor=1, xtol=1e-24)
        pH = -1 * math.log10(x)
        pHs.append(pH)
        print(se, ae, pH, x, y, equations((x, y)))
    ax.plot(range(120), pHs, label='{} equiv'.format(se))

ax.set_ylabel('pH')
ax.set_xlabel('[HCl] equiv')
ax.minorticks_on()
ax.grid(True, which='both')
ax.legend()
```

The script provides for successive iteration given an initial estimate to arrive at a calculated value. The features *factor* and *xtol* make the respective initial iteration step and error tolerance small. A root expected here is as small as  $10^{-7}$  (pH = 7). The error was assessed by putting the calculated roots back into the acid-base equation. The maximum error was  $1.78 \times 10^{-15}$ . The resulting pH estimates are in excellent agreement with expected values. For example, with no HCl the calculated pH is 7.0, in agreement with expectation.

## (3) NMR data

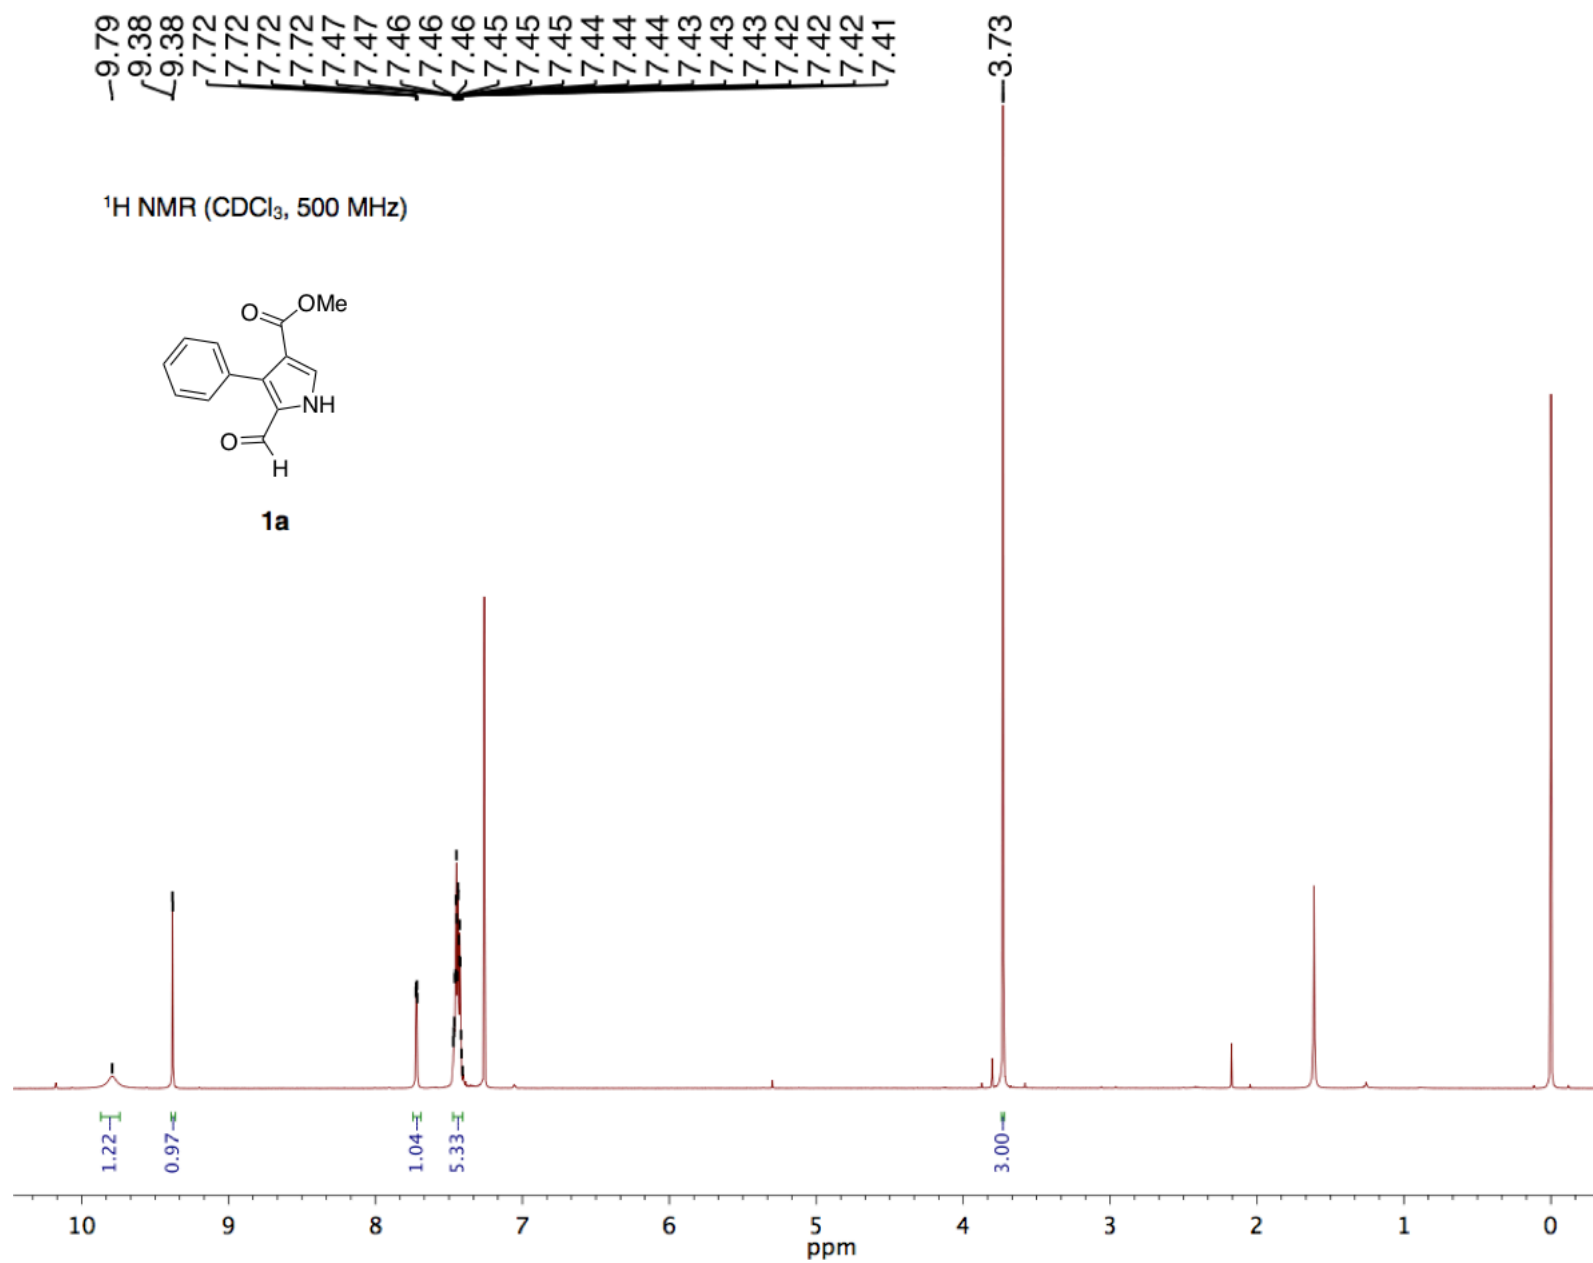

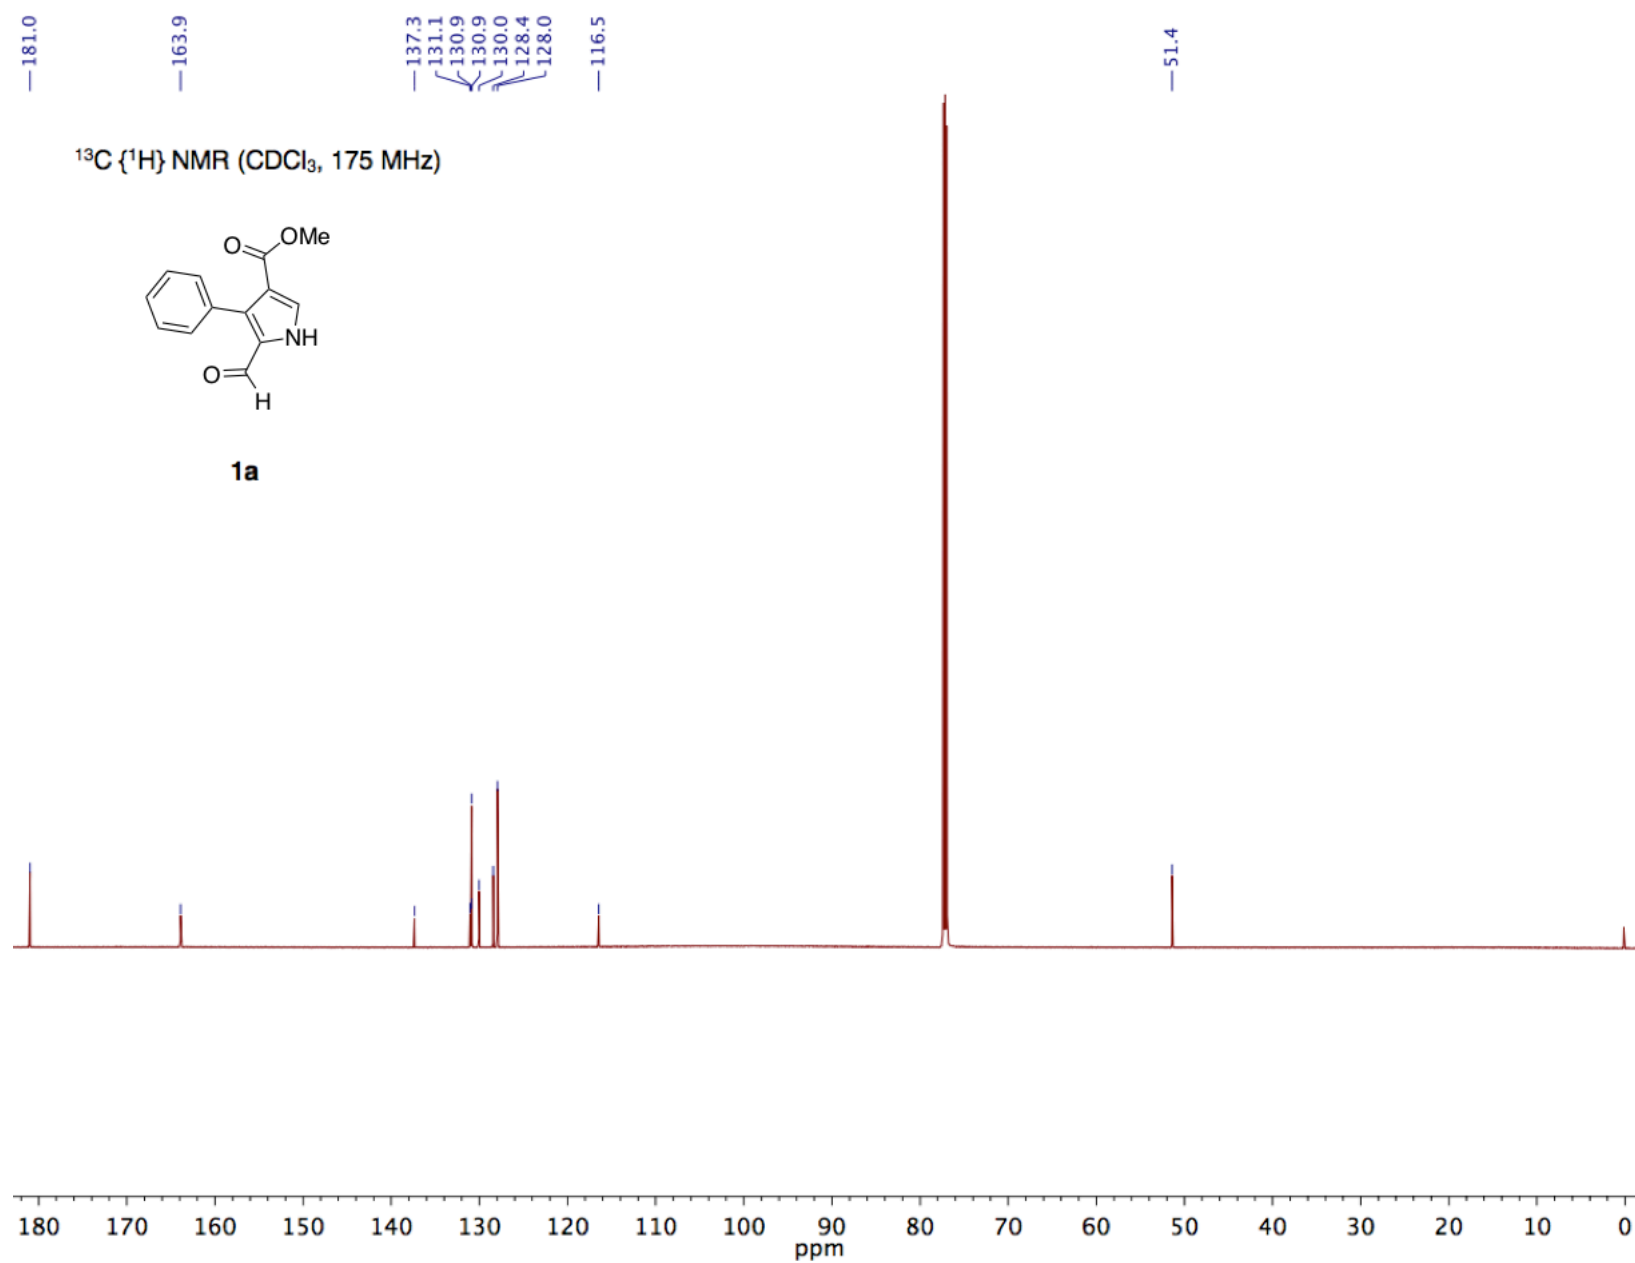

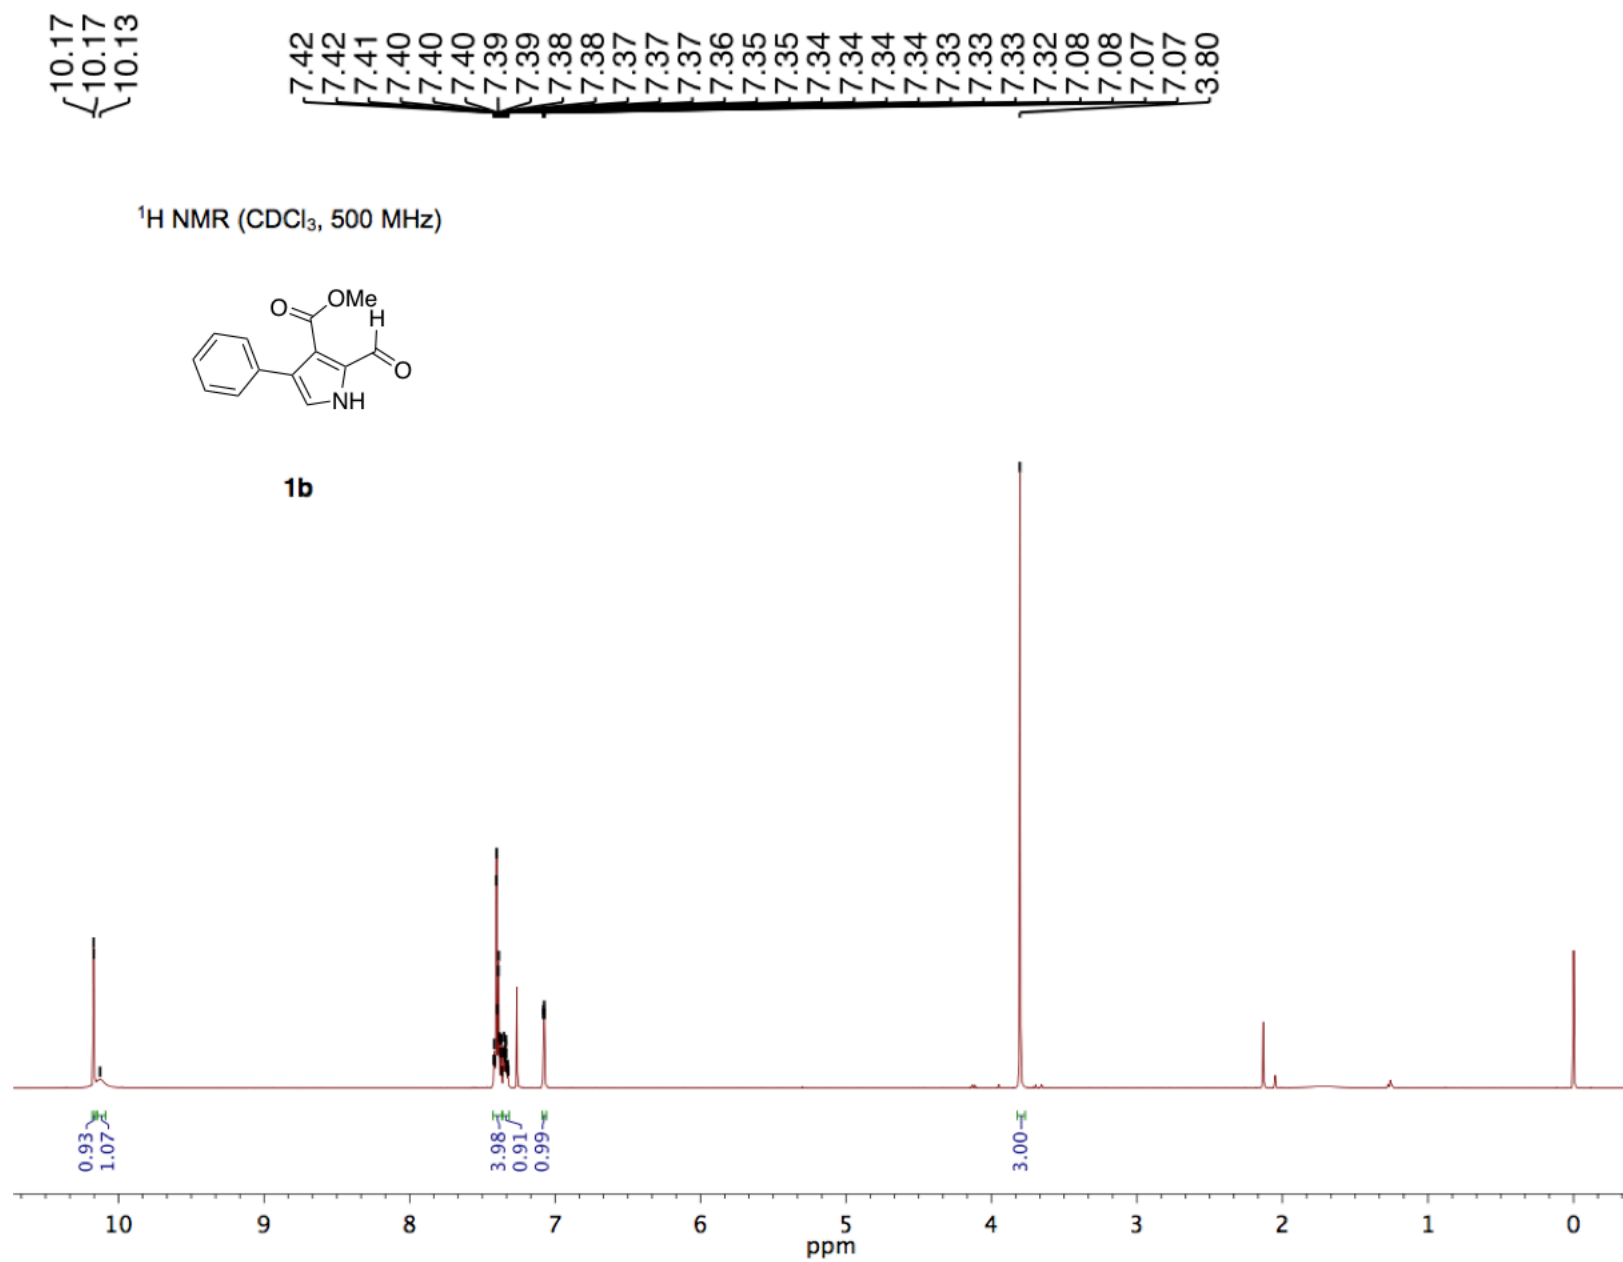

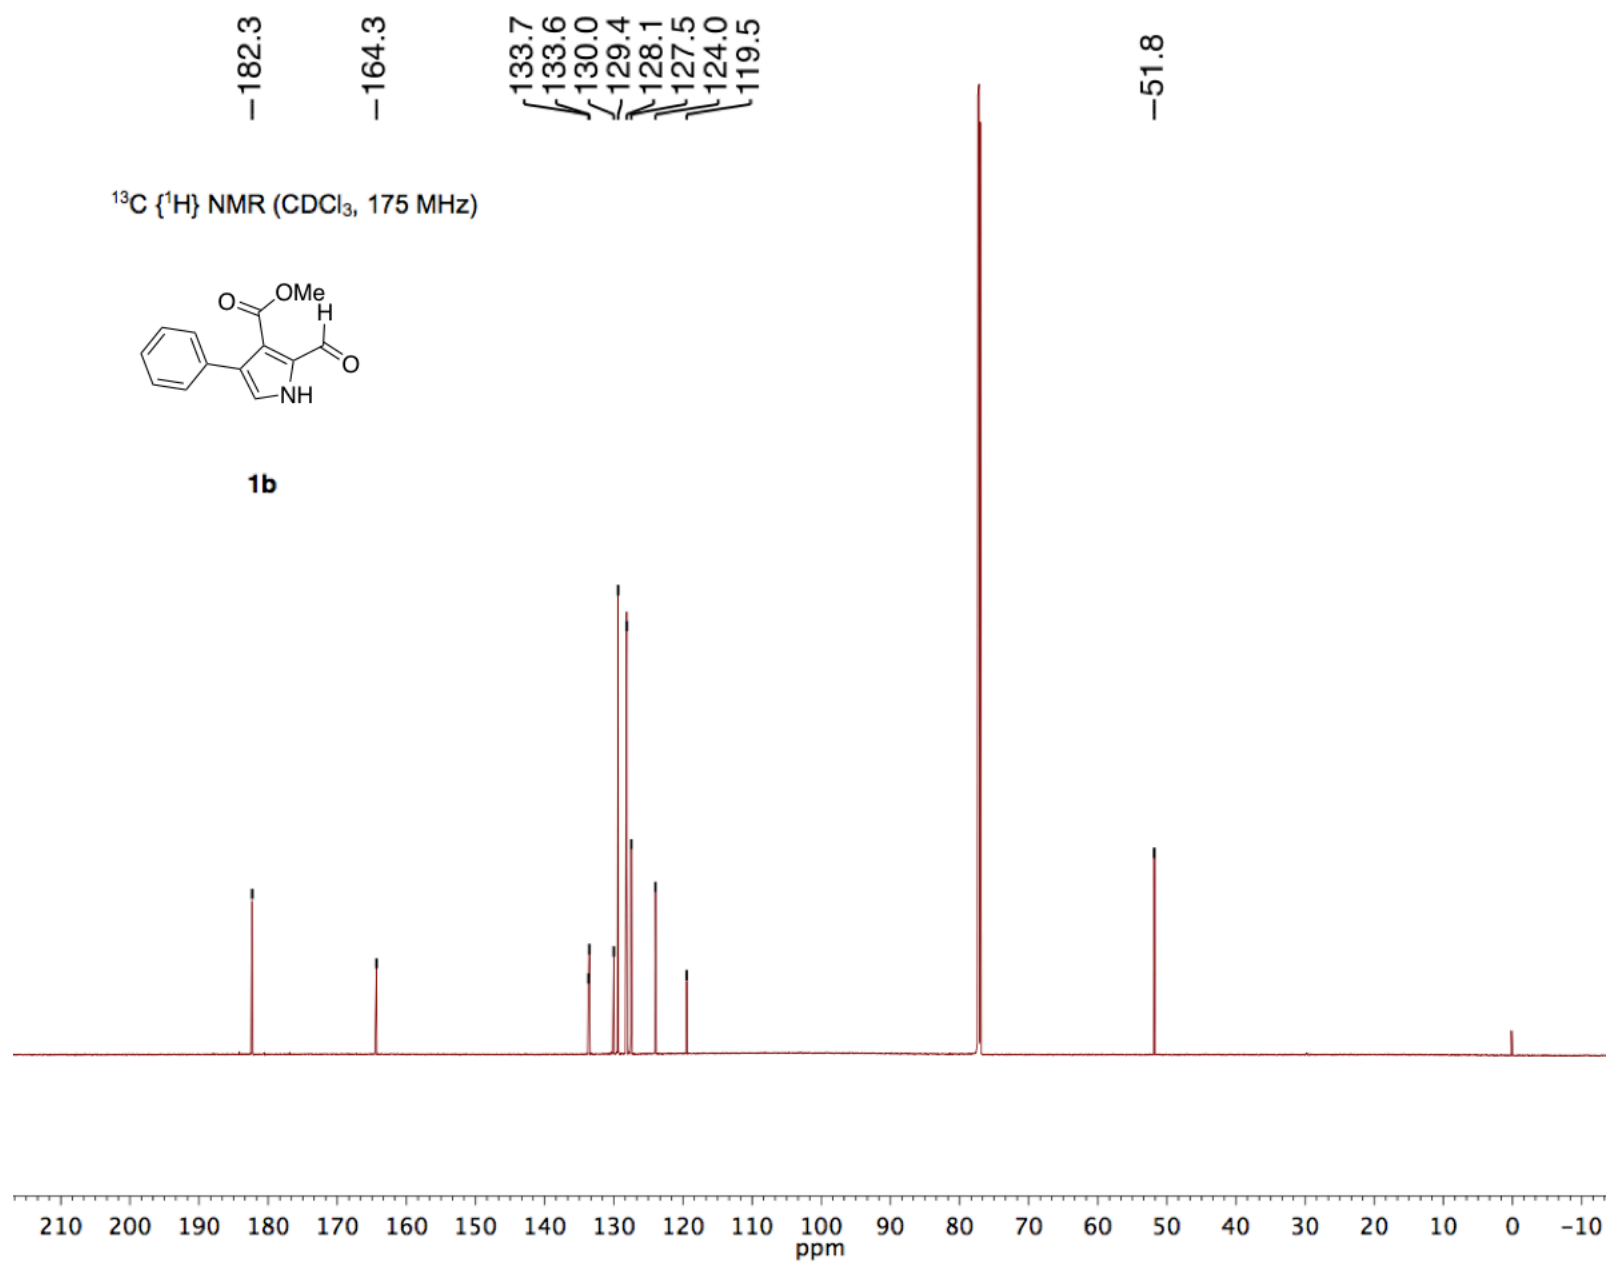

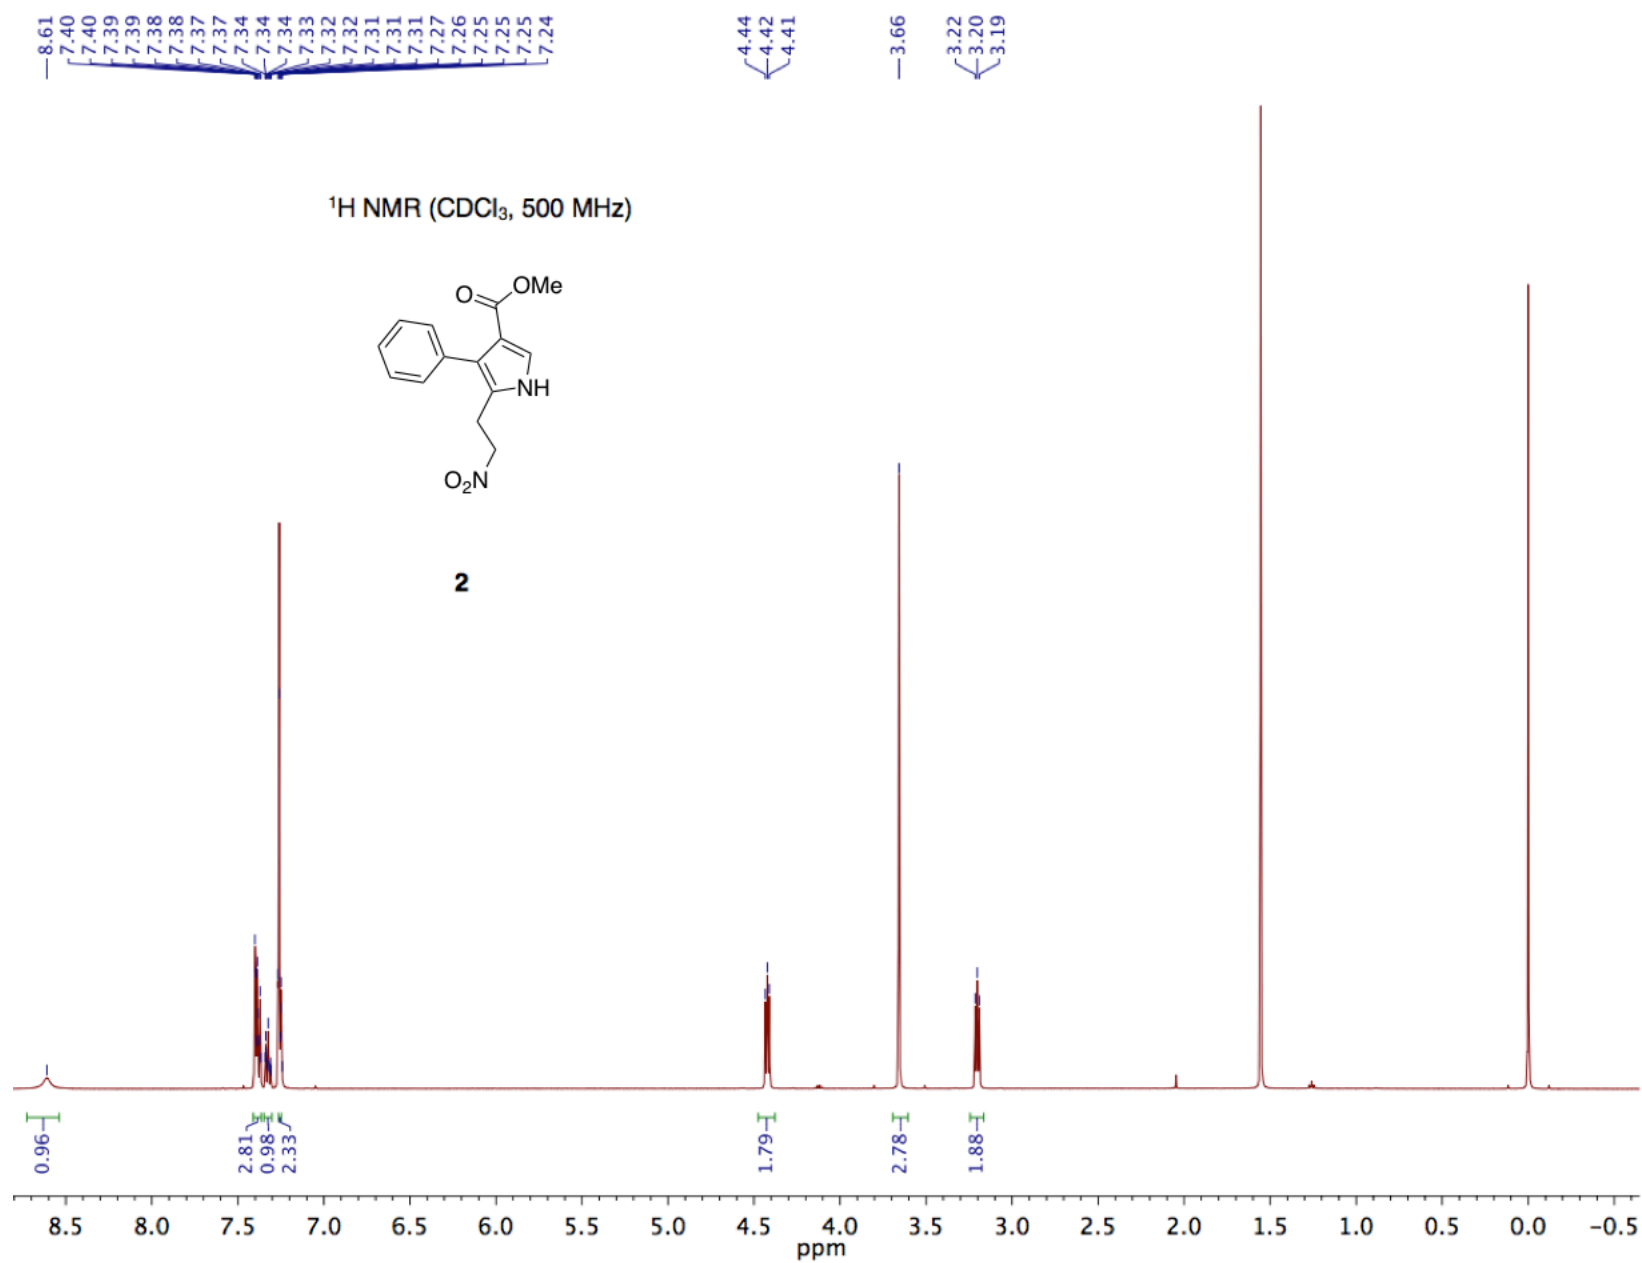



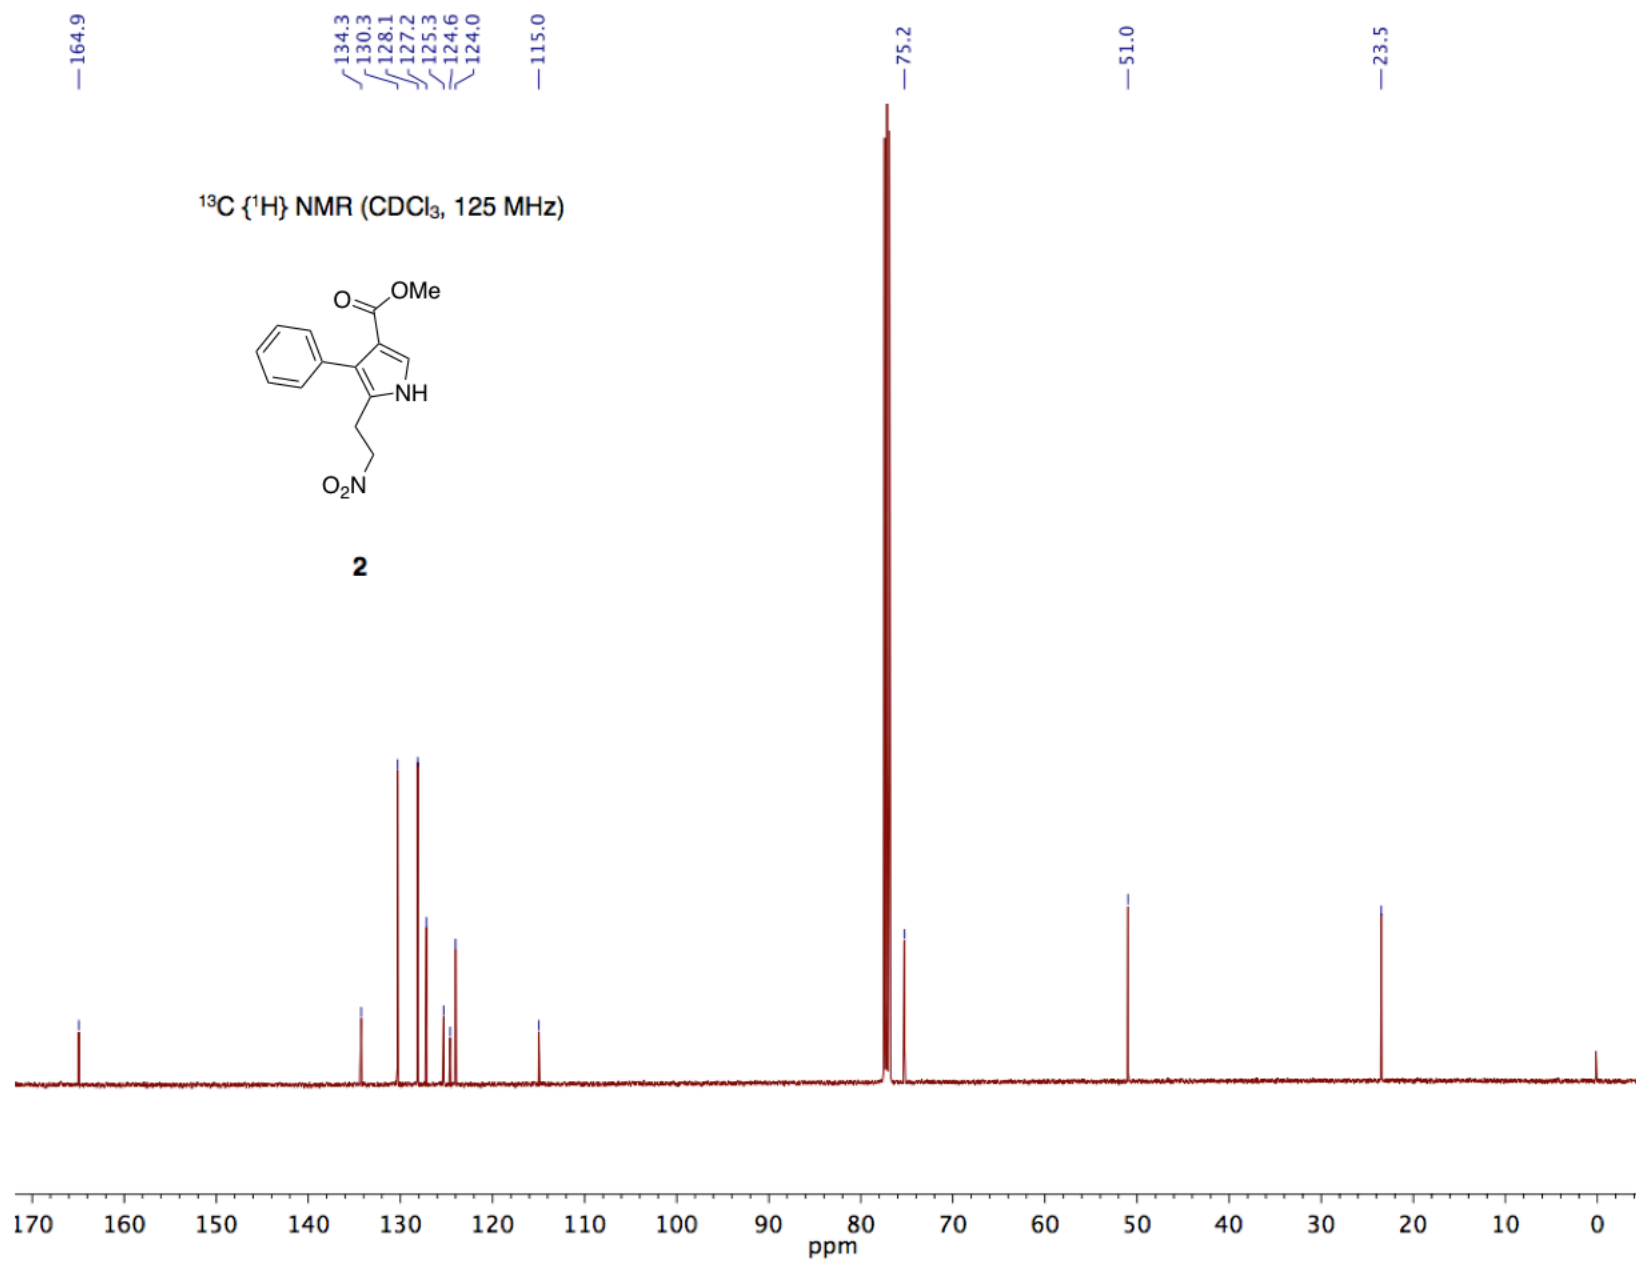





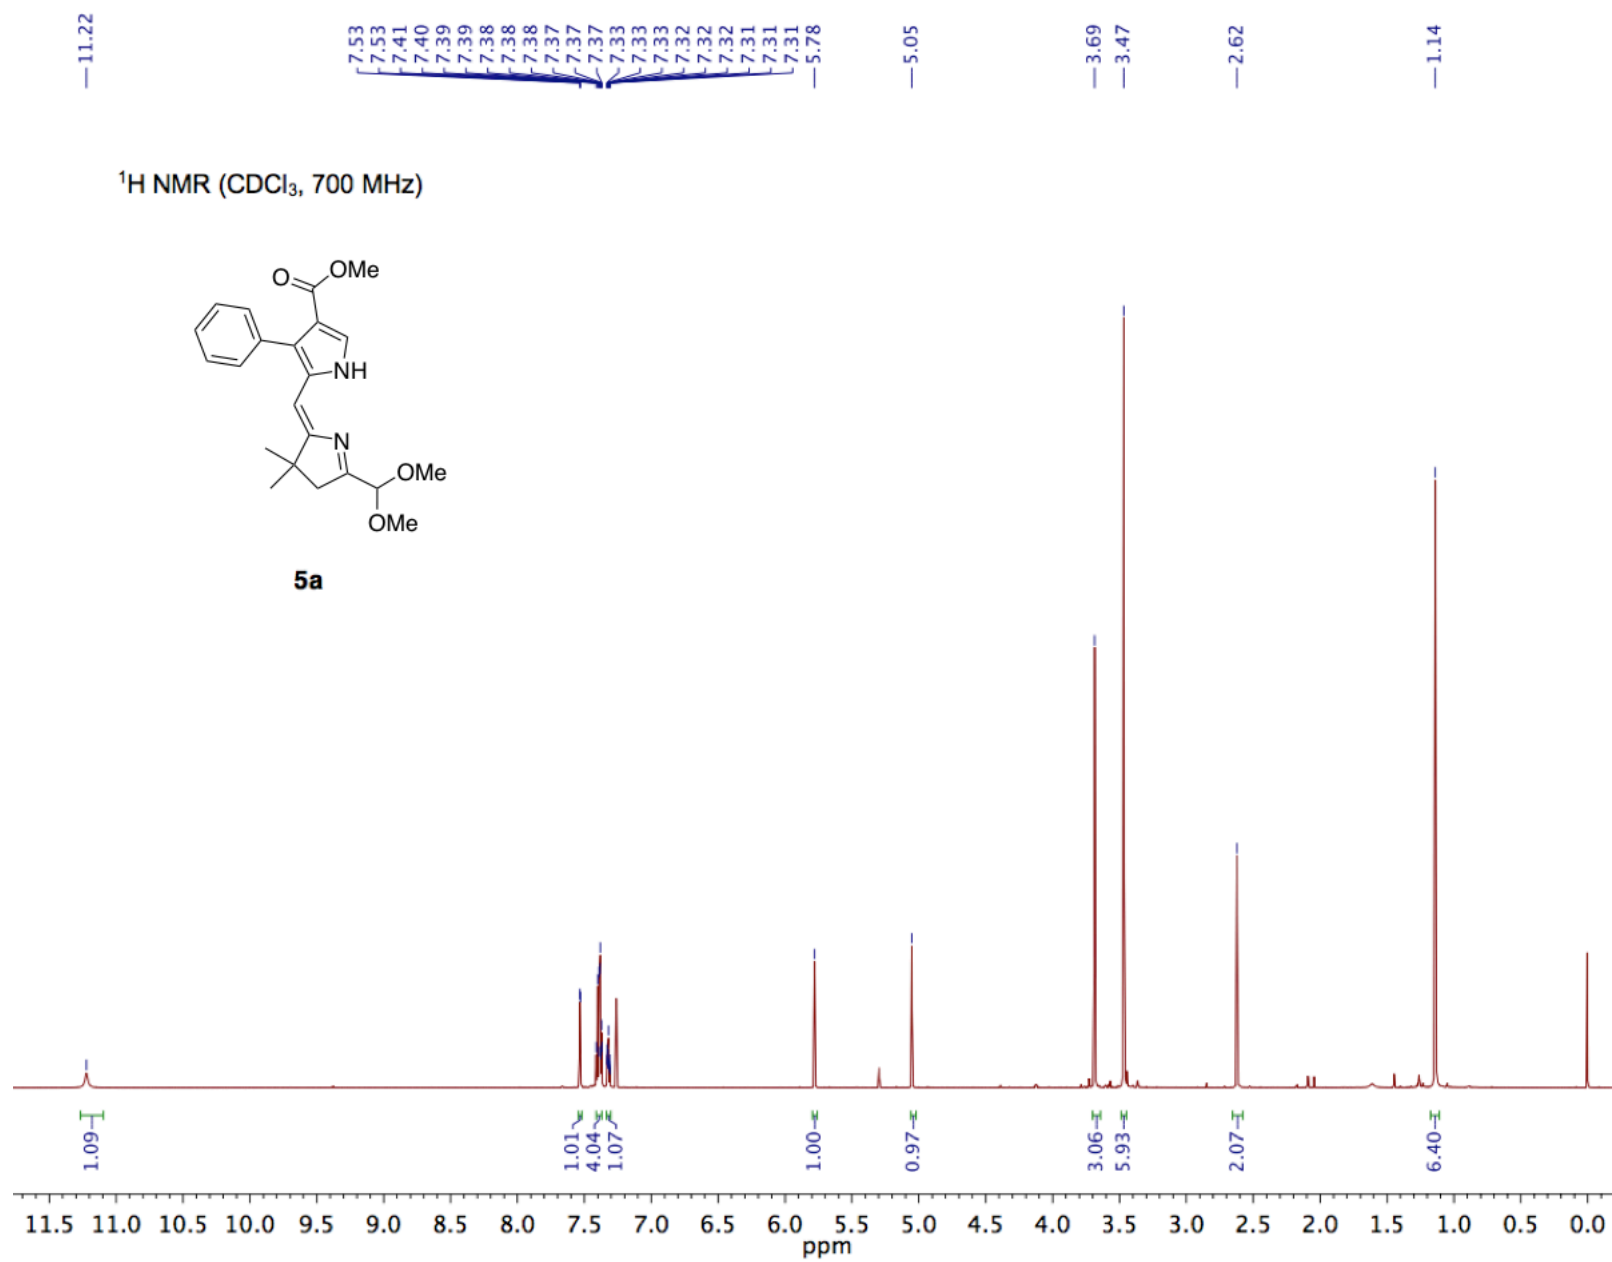

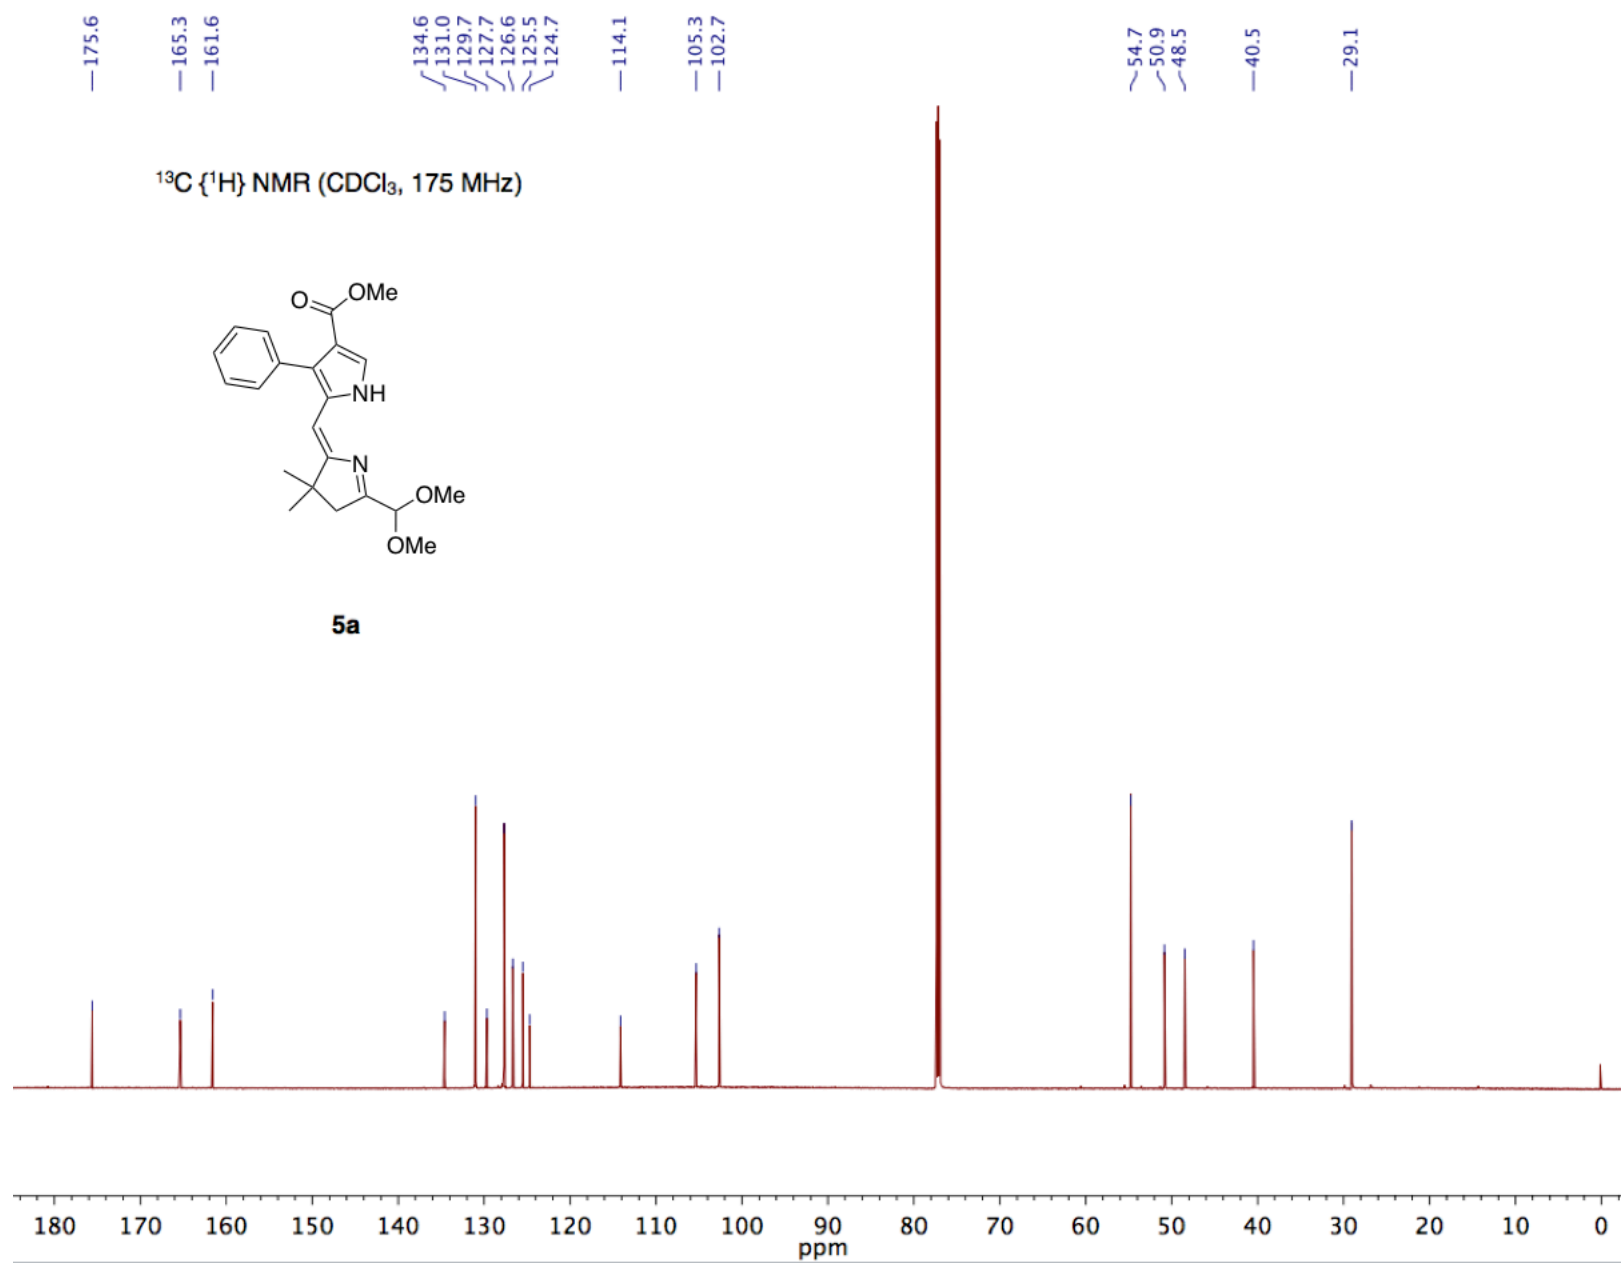

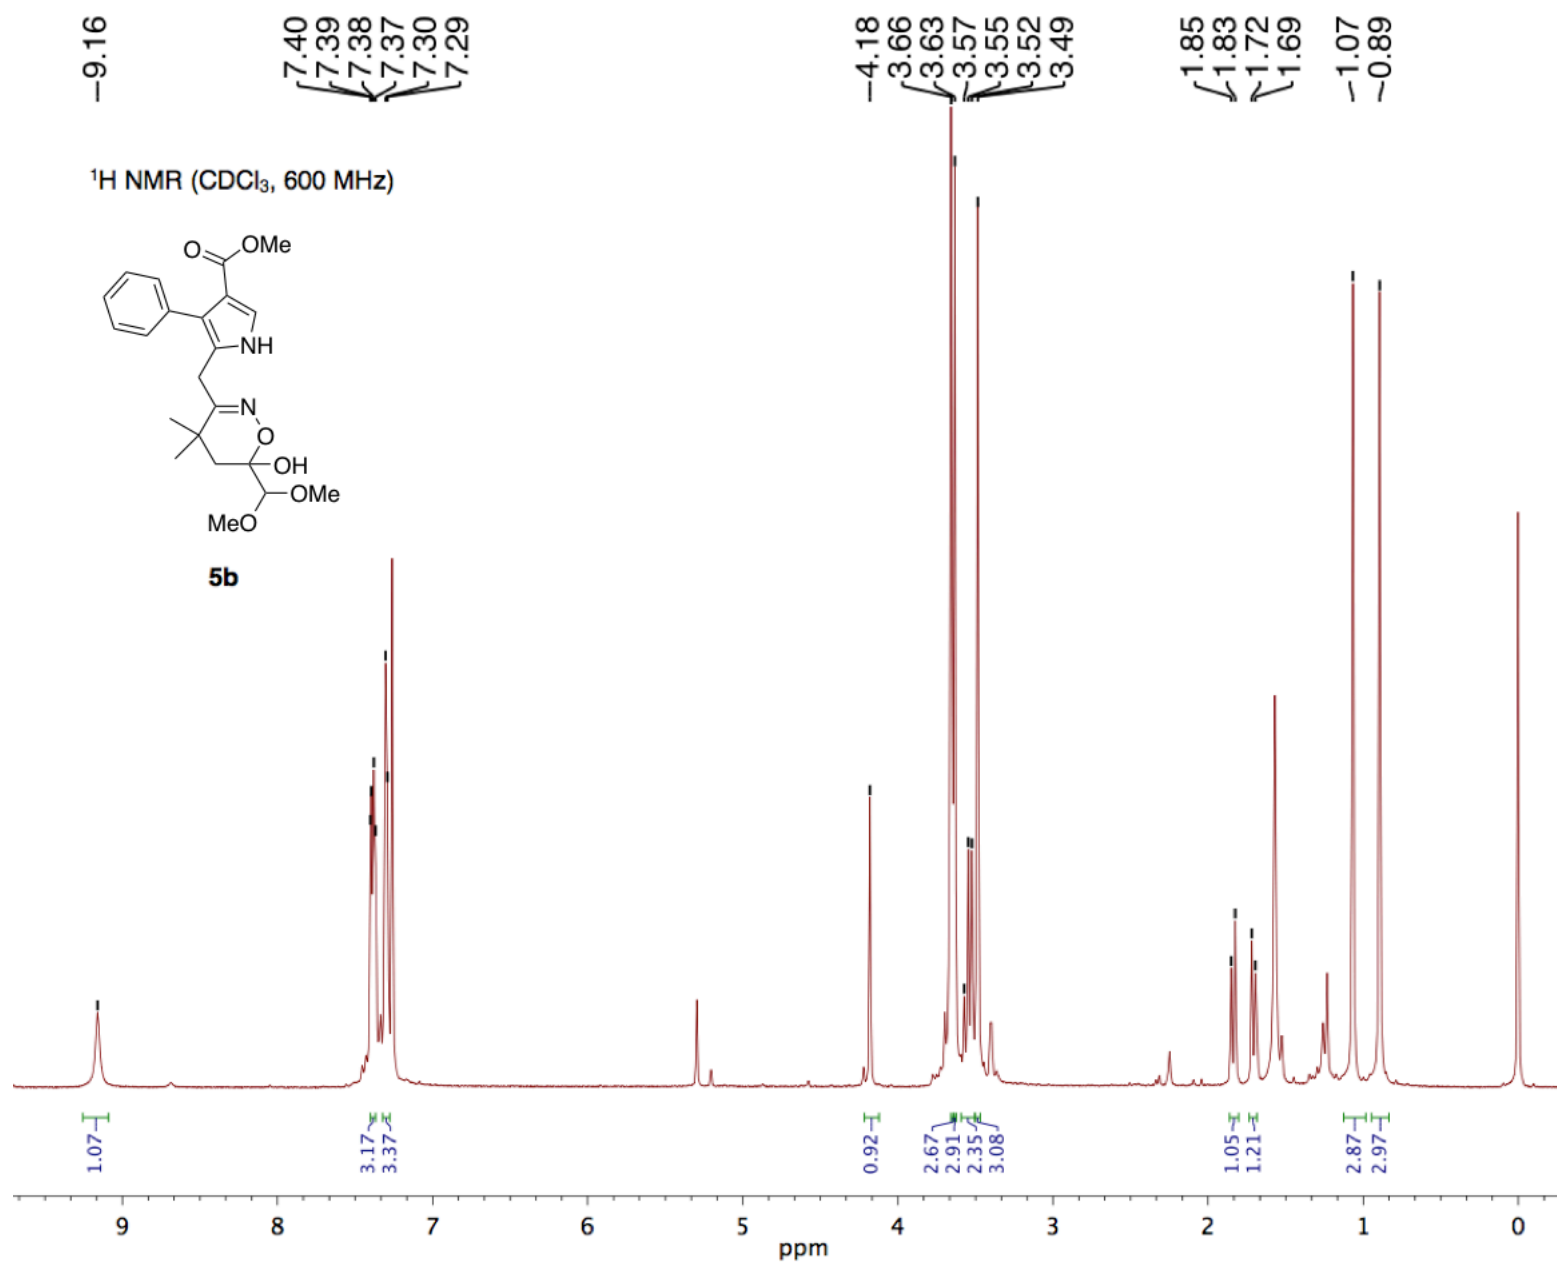

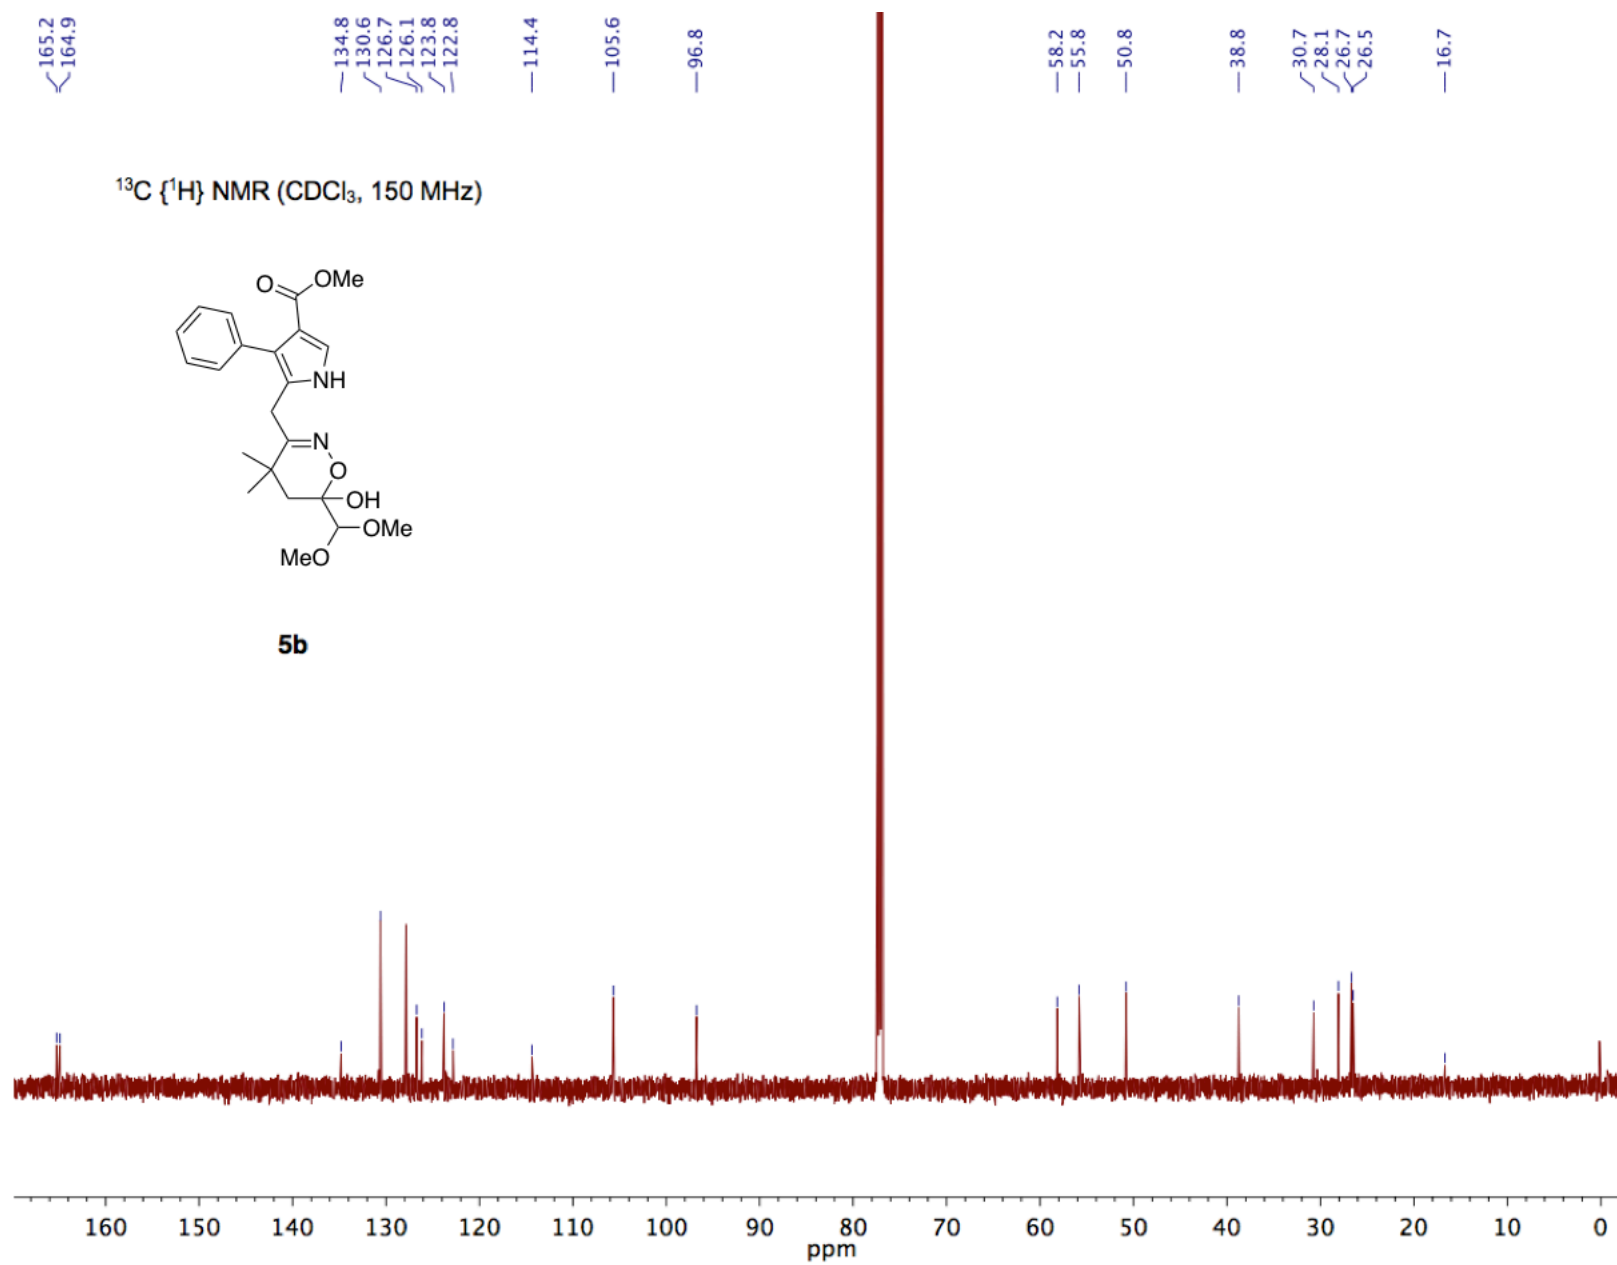

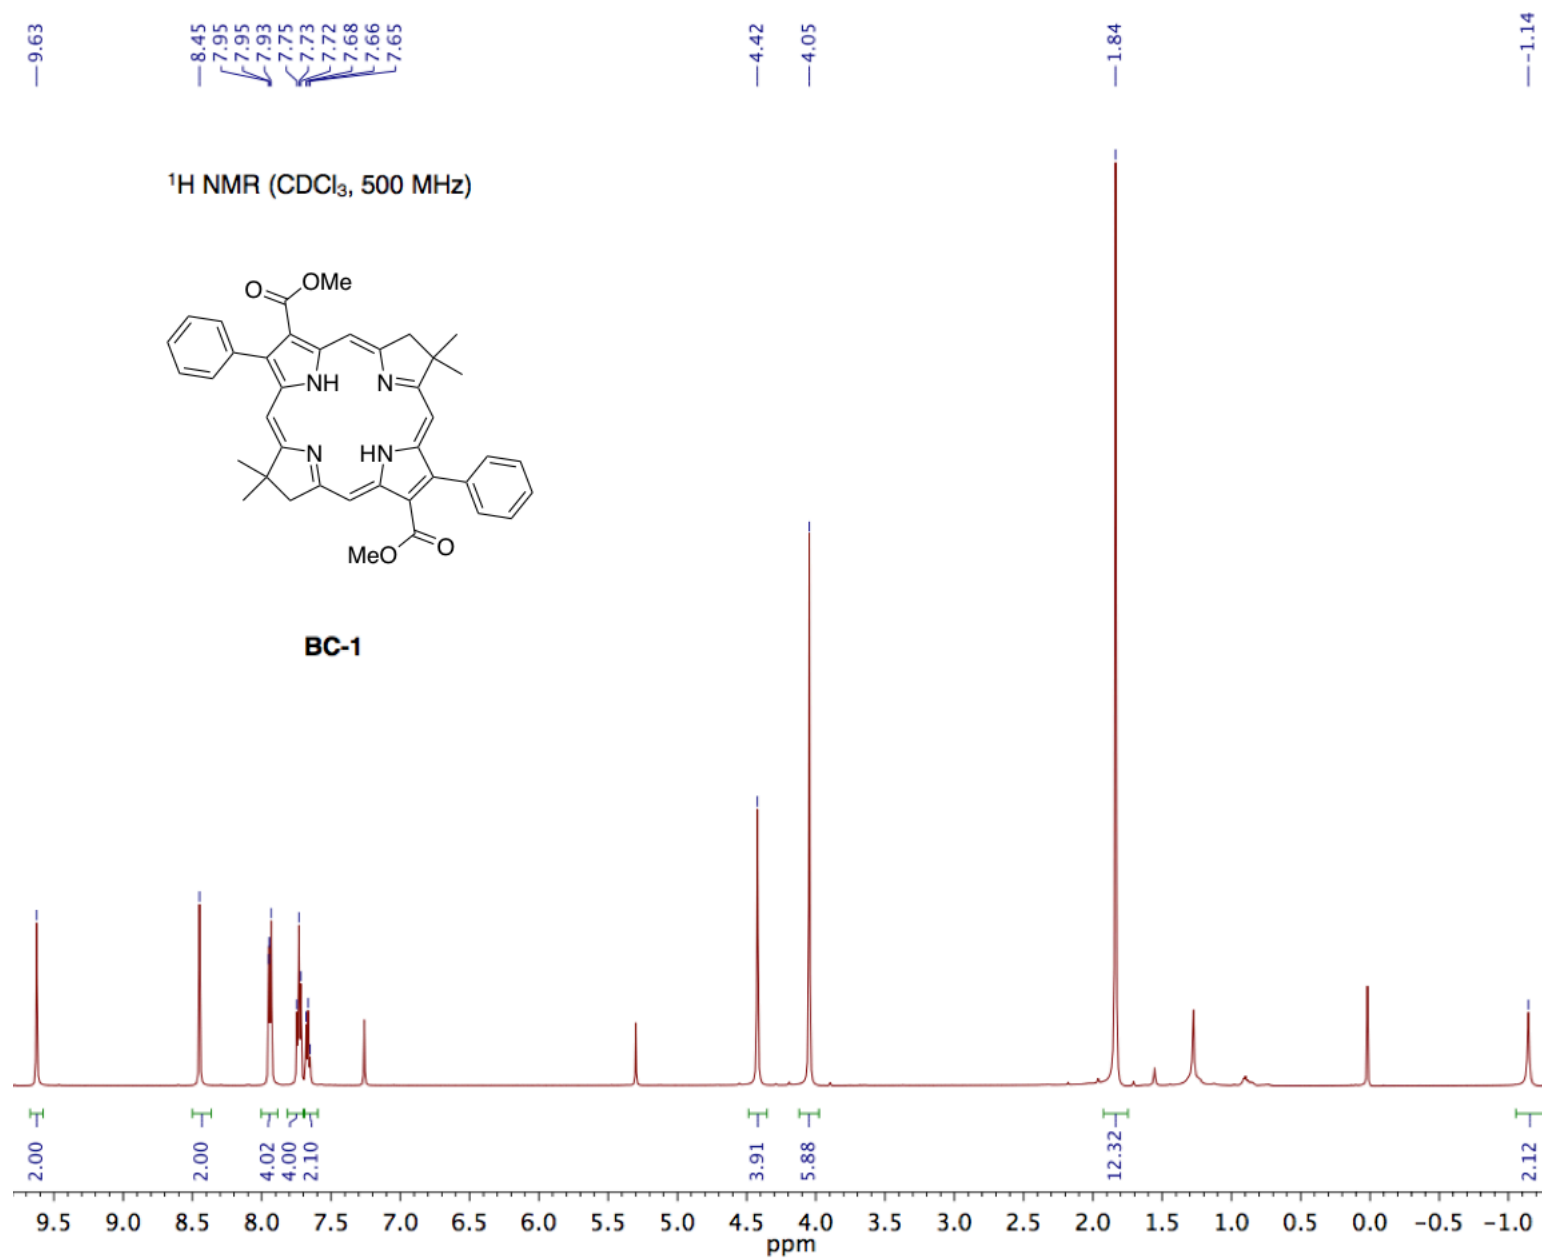



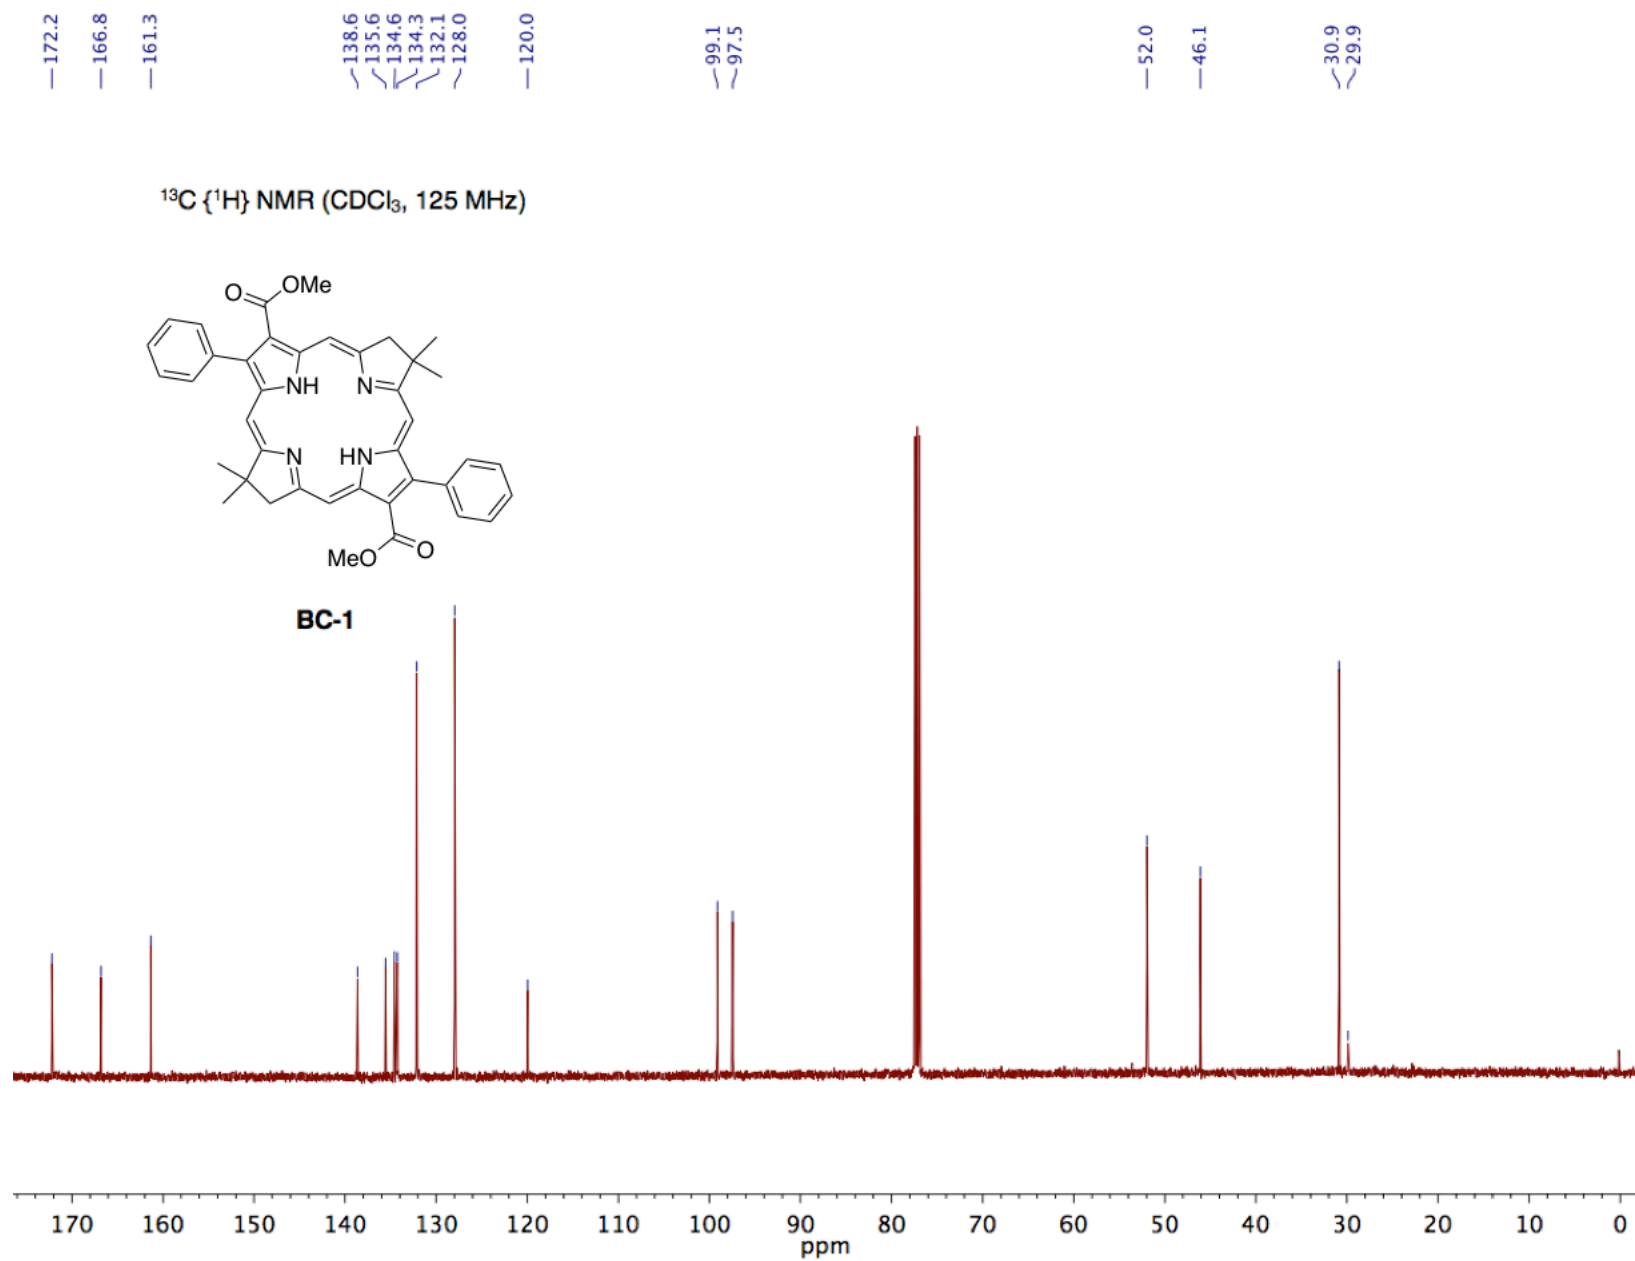

Supplement: s1 [file s1]
